# Supplementary material
Source: ML conference proceedings conference paper supplement (https://openreview.net/forum?id=B7QkdEnjL9)

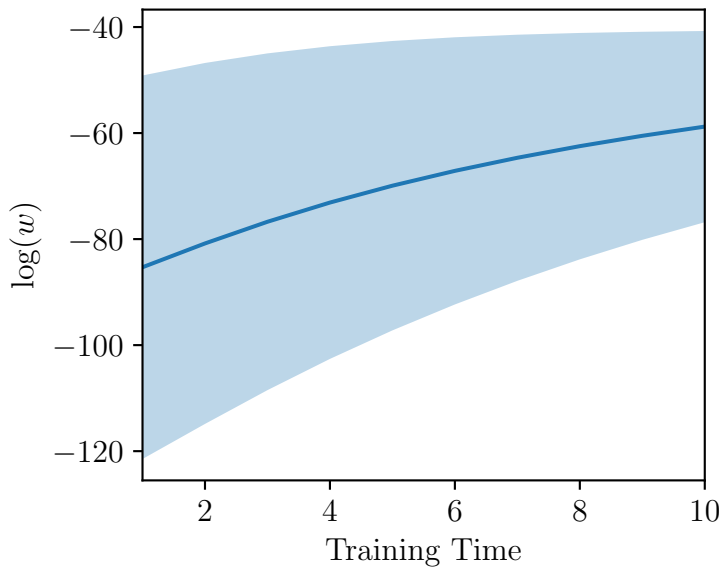

Supplement: supplementary_material [file attachment]

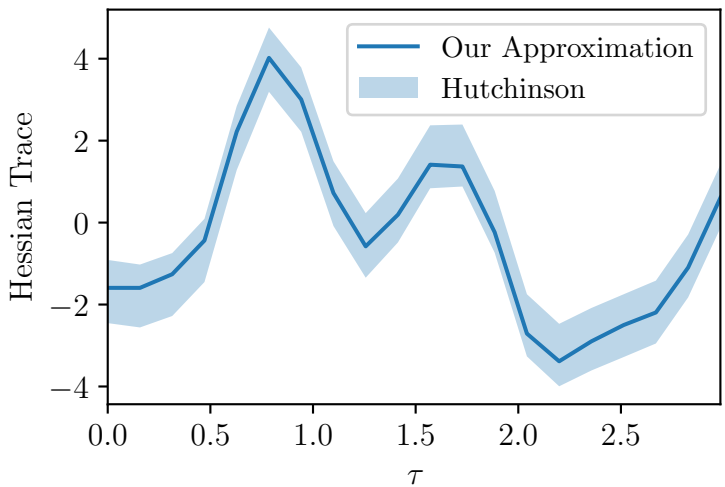

Supplement: supplementary_material [file attachment]

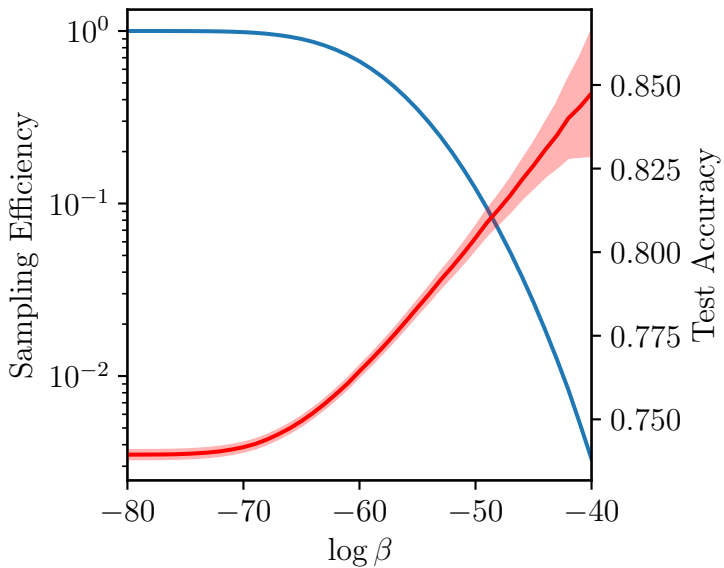

Supplement: supplementary_material [file attachment]

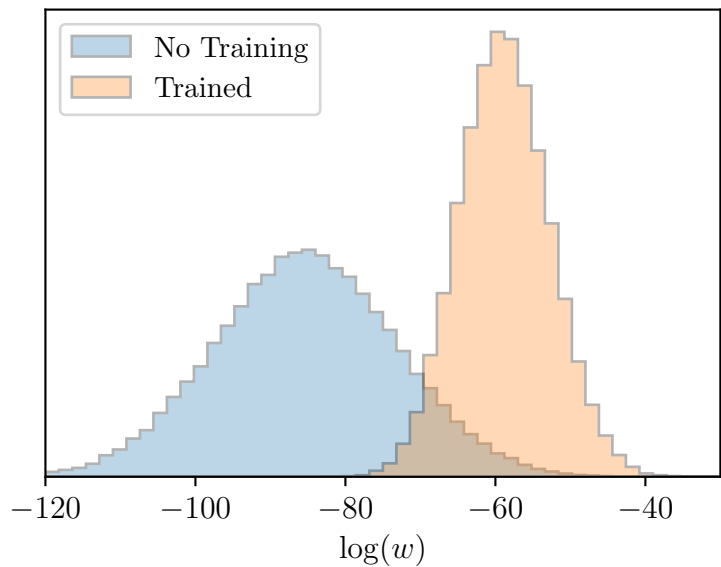

Supplement: supplementary_material [file attachment]

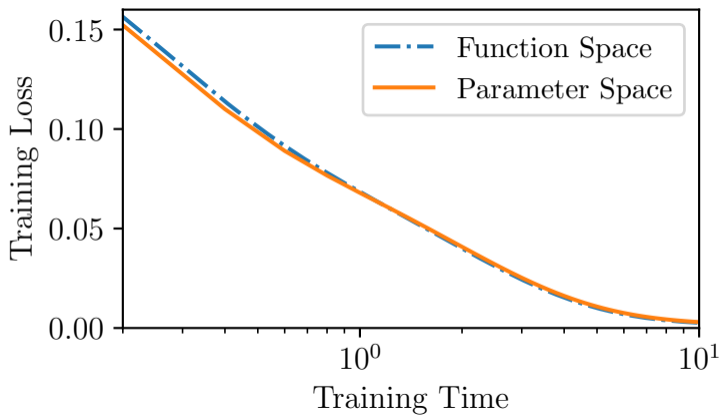

Supplement: supplementary_material [file attachment]

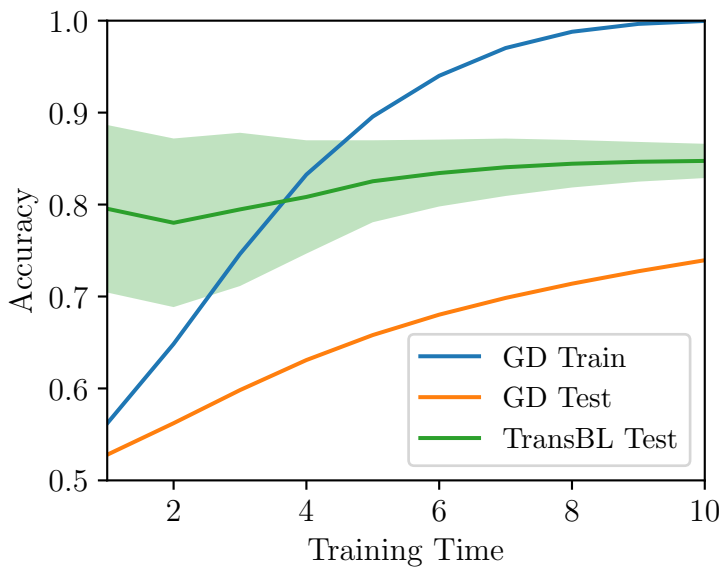

Supplement: supplementary_material [file attachment]

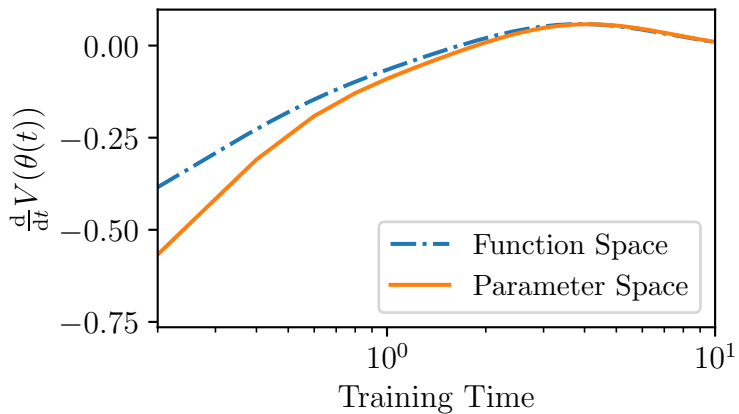

Supplement: supplementary_material [file attachment]

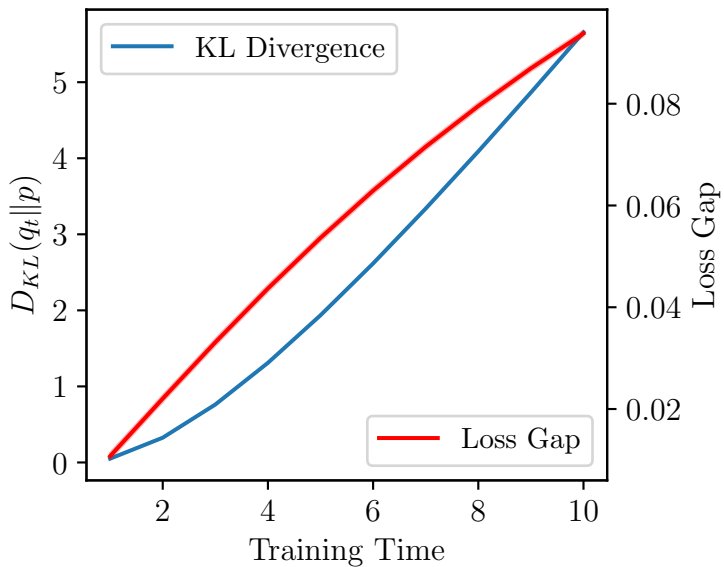

Supplement: supplementary_material [file attachment]

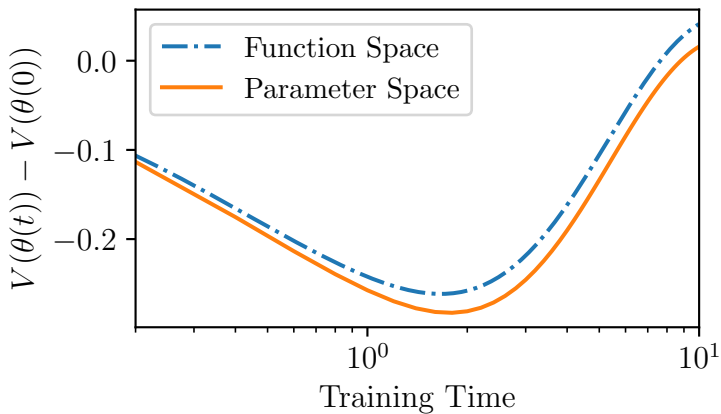

Supplement: supplementary_material [file attachment]

Hessian Trace

Function Space  
Parameter Space

$10^0$

$10^1$

Training Time

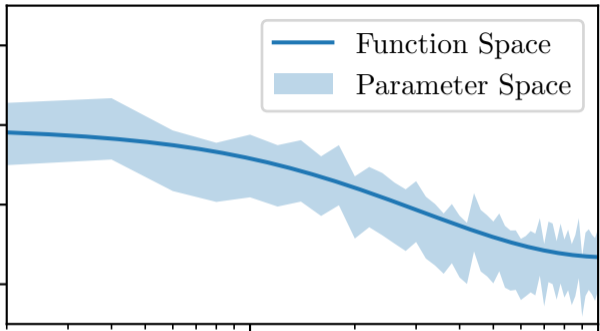

Supplement: supplementary_material [file attachment]

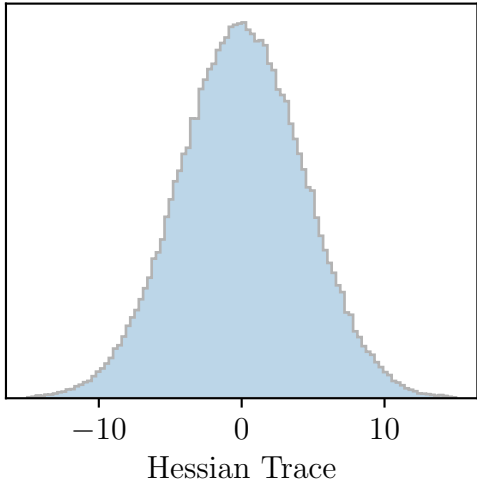

Supplement: supplementary_material [file attachment]
